# Supplementary material for: A New Propolis Type from Changbai Mountains in North-east China: Chemical Composition, Botanical Origin and Biological Activity
Source: PubMed Central journal article supplement (PMC6479873; doi:10.3390/molecules24071369), 2019-04-08
Supplement: molecules-24-01369-s001.pdf [file molecules-24-01369-s001.pdf]

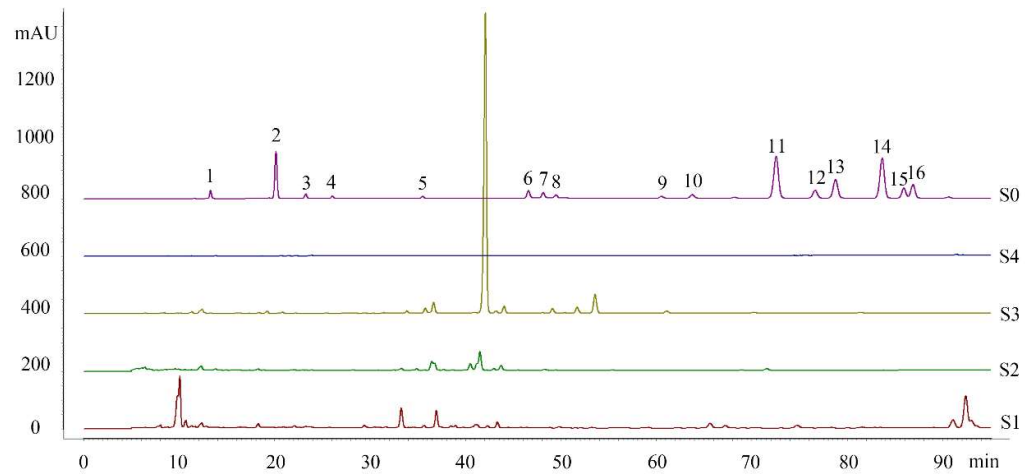

**Figure S1.** The HPLC chromatograms of the bud and tender leaves extracts of *Betula platyphylla* Suk.(S1), *Salix matsudana* Koidz.(S2), *Phellodendron amurense* Rupr.(S3), *Pinus densiflora* Sieb.et Zucc.(S4) and standard solution (S0).

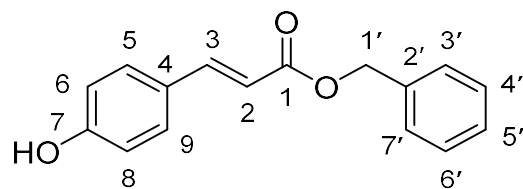

**Figure S2.** Structures of benzyl *p*-coumarate

**Table S1.** The content of common compounds in different CBM propolis.

| Samples No. | Amount (mg/g, mean $\pm$ SD) |                         |                 |                 |                            |                 |                 |                 |                 |                 |                  |                  |                       |                  |                 |                  |
|-------------|------------------------------|-------------------------|-----------------|-----------------|----------------------------|-----------------|-----------------|-----------------|-----------------|-----------------|------------------|------------------|-----------------------|------------------|-----------------|------------------|
|             | Caffeic acid                 | <i>p</i> -Coumaric acid | Ferulic acid    | Isoferulic acid | 3,4-Dimethoxycinnamic acid | Pinobanksin     | Naringenin      | Quercetin       | Kaempferol      | Apigenin        | Pinocebrin       | Benzylcaffeate   | 3-Oacetyl pinobanksin | Chrysin          | CAPE            | Galangin         |
| S1          | 6.34 $\pm$ 0.06              | 45.23 $\pm$ 0.47        | 5.65 $\pm$ 0.06 | 2.19 $\pm$ 0.01 | 1.34 $\pm$ 0.01            | 0.65 $\pm$ 0.01 | 0.77 $\pm$ 0.15 | 0.96 $\pm$ 0.25 | 0.85 $\pm$ 0.02 | 0.74 $\pm$ 0.03 | 54.45 $\pm$ 0.56 | 34.3 $\pm$ 0.37  | 2.52 $\pm$ 0.03       | 9.50 $\pm$ 0.1   | 1.38 $\pm$ 0.02 | 29.09 $\pm$ 0.32 |
| S2          | 3.19 $\pm$ 0.04              | 19.54 $\pm$ 0.20        | 3.33 $\pm$ 0.04 | 1.43 $\pm$ 0.02 | 1.41 $\pm$ 0.02            | 3.46 $\pm$ 0.04 | 0.80 $\pm$ 0.01 | 0.99 $\pm$ 0.01 | 1.13 $\pm$ 0.01 | 1.63 $\pm$ 0.02 | 57.12 $\pm$ 0.69 | 21.87 $\pm$ 0.3  | 18.22 $\pm$ 0.23      | 14.06 $\pm$ 0.17 | 4.86 $\pm$ 0.06 | 24.67 $\pm$ 0.29 |
| S3          | 4.19 $\pm$ 0.01              | 29.95 $\pm$ 0.13        | 4.33 $\pm$ 0.01 | 1.72 $\pm$ 0.01 | 1.14 $\pm$ 0.00            | 1.14 $\pm$ 0.00 | 0.88 $\pm$ 0.03 | 1.13 $\pm$ 0.05 | 0.94 $\pm$ 0.00 | 1.17 $\pm$ 0.01 | 42.93 $\pm$ 0.11 | 21.53 $\pm$ 0.08 | 5.64 $\pm$ 0.01       | 8.88 $\pm$ 0.03  | 1.91 $\pm$ 0.00 | 23.46 $\pm$ 0.08 |
| S4          | 5.54 $\pm$ 0.08              | 31.41 $\pm$ 0.51        | 5.5 $\pm$ 0.08  | 2.34 $\pm$ 0.01 | 1.45 $\pm$ 0.02            | 1.62 $\pm$ 0.03 | 1.04 $\pm$ 0.02 | 1.38 $\pm$ 0.03 | 1.31 $\pm$ 0.01 | 1.55 $\pm$ 0.01 | 67.00 $\pm$ 0.96 | 29.24 $\pm$ 0.45 | 8.69 $\pm$ 0.13       | 11.11 $\pm$ 0.16 | 2.56 $\pm$ 0.04 | 26.86 $\pm$ 0.04 |
| S5          | 4.20 $\pm$ 0.06              | 23.38 $\pm$ 0.29        | 3.5 $\pm$ 0.05  | 2.04 $\pm$ 0.04 | 3.00 $\pm$ 0.04            | 3.87 $\pm$ 0.06 | 0.77 $\pm$ 0.01 | 0.96 $\pm$ 0.01 | 1.3 $\pm$ 0.02  | 1.71 $\pm$ 0.03 | 52.16 $\pm$ 0.73 | 17.53 $\pm$ 0.4  | 16.98 $\pm$ 0.23      | 13.83 $\pm$ 0.19 | 4.38 $\pm$ 0.05 | 23.19 $\pm$ 0.03 |
| S6          | 2.80 $\pm$ 0.01              | 18.82 $\pm$ 0.09        | 2.67 $\pm$ 0.00 | 0.87 $\pm$ 0.00 | 0.71 $\pm$ 0.01            | 6.7 $\pm$ 0.03  | 1.13 $\pm$ 0.10 | 1.52 $\pm$ 0.16 | 2.31 $\pm$ 0.01 | 1.22 $\pm$ 0.39 | 58.55 $\pm$ 0.03 | 9.60 $\pm$ 0.20  | 30.32 $\pm$ 0.05      | 18.18 $\pm$ 0.08 | 6.98 $\pm$ 0.05 | 26.46 $\pm$ 0.07 |
| S7          | 4.05 $\pm$ 0.00              | 25.8 $\pm$ 0.06         | 4.13 $\pm$ 0.01 | 1.78 $\pm$ 0.01 | 1.52 $\pm$ 0.00            | 4.00 $\pm$ 0.37 | 4.51 $\pm$ 0.65 | 1.31 $\pm$ 0.25 | 1.31 $\pm$ 0.01 | 1.34 $\pm$ 0.03 | 63.83 $\pm$ 0.13 | 31.06 $\pm$ 0.03 | 15.12 $\pm$ 0.06      | 15.15 $\pm$ 0.02 | 6.30 $\pm$ 0.00 | 29.59 $\pm$ 0.02 |
| S8          | 8.03 $\pm$ 0.03              | 30.09 $\pm$ 0.08        | 5.24 $\pm$ 0.02 | 3.5 $\pm$ 0.01  | 2.82 $\pm$ 0.02            | 6.62 $\pm$ 0.02 | 2.94 $\pm$ 0.02 | 1.70 $\pm$ 0.02 | 2.40 $\pm$ 0.01 | 1.14 $\pm$ 0.00 | 71.14 $\pm$ 0.22 | 32.45 $\pm$ 0.12 | 36.28 $\pm$ 0.11      | 21.36 $\pm$ 0.09 | 7.34 $\pm$ 0.03 | 32.22 $\pm$ 0.12 |
| S9          | 4.45 $\pm$ 0.01              | 17.2 $\pm$ 0.04         | 3.27 $\pm$ 0.43 | 1.43 $\pm$ 0.00 | 1.26 $\pm$ 0.00            | 2.96 $\pm$ 0.13 | 3.26 $\pm$ 0.30 | 1.63 $\pm$ 0.09 | 1.12 $\pm$ 0.01 | 1.28 $\pm$ 0.01 | 49.44 $\pm$ 0.11 | 10.85 $\pm$ 0.07 | 16.65 $\pm$ 0.03      | 12.46 $\pm$ 0.02 | 3.91 $\pm$ 0.01 | 20.02 $\pm$ 0.03 |
| S10         | 3.59 $\pm$ 0.02              | 31.38 $\pm$ 0.13        | 5.09 $\pm$ 0.02 | 1.28 $\pm$ 0.01 | 0.71 $\pm$ 0.00            | 0.80 $\pm$ 0.01 | 4.78 $\pm$ 0.02 | 0               | 0.91 $\pm$ 0.01 | 1.02 $\pm$ 0.00 | 54.30 $\pm$ 0.22 | 23.23 $\pm$ 0.1  | 2.22 $\pm$ 0.01       | 7.60 $\pm$ 0.03  | 1.52 $\pm$ 0.01 | 25.12 $\pm$ 0.09 |

|     |           |            |           |           |           |            |           |           |           |           |            |            |            |            |           |            |
|-----|-----------|------------|-----------|-----------|-----------|------------|-----------|-----------|-----------|-----------|------------|------------|------------|------------|-----------|------------|
| S11 | 2.79±0.01 | 8.61±0.01  | 1.59±0.01 | 1.98±0.00 | 2.26±0.00 | 8.25±0.02  | 2.39±0.01 | 2.14±0.01 | 2.11±0.01 | 1.2±0.03  | 73.29±0.09 | 12.19±0.05 | 36.57±0.29 | 21.97±0.04 | 5.13±0.01 | 32.81±0.04 |
| S12 | 2.66±0.01 | 32.06±0.07 | 3.96±0.01 | 0.9±0.00  | 0.60±0.00 | 5.40±0.03  | 2.47±0.08 | 2.04±0.06 | 2.00±0.00 | 0         | 72.35±0.09 | 25.36±0.04 | 6.19±0.03  | 17.23±0.02 | 0         | 40.33±0.05 |
| S13 | 3.19±0.37 | 20.85±0.05 | 2.21±0.04 | 0.88±0.01 | 0.60±0.01 | 19.89±0.17 | 2.61±0.20 | 1.43±0.09 | 2.66±0.47 | 1.27±0.83 | 87.33±0.11 | 19.53±0.13 | 5.00±0.85  | 24.55±5.17 | 5.93±0.03 | 39.55±0.58 |
| S14 | 3.44±0.01 | 28.3±0.10  | 3.87±0.02 | 1.01±0.01 | 0.58±0.00 | 0.51±0.00  | 5.44±0.02 | 2.89±0.01 | 1.23±0.00 | 1.23±0.00 | 89.06±0.36 | 65.15±0.25 | 8.86±0.03  | 8.67±0.04  | 1.76±0.02 | 28.17±0.12 |
| S15 | 4.17±0.04 | 36.55±0.46 | 3.31±0.04 | 1.68±0.08 | 1.51±0.02 | 1.20±0.01  | 3.04±0.44 | 1.83±0.67 | 1.79±0.84 | 1.78±0.06 | 67.20±0.81 | 25.17±0.11 | 7.23±2.02  | 16.39±8.46 | 2.4±0.03  | 31.85±5.06 |
| S16 | 4.41±0.01 | 33.17±0.07 | 4.07±0.01 | 1.71±0.00 | 0.86±0.00 | 0.69±0.00  | 3.85±0.03 | 2.42±0.12 | 1.11±0.03 | 1.32±0.01 | 61.07±0.14 | 37.62±0.08 | 10.30±0.01 | 8.47±0.02  | 2.06±0.02 | 29.75±0.05 |
| S17 | 7.4±0.08  | 65.75±0.75 | 8.03±0.09 | 2.4±0.02  | 1.33±0.01 | 0.30±0.00  | 3.38±0.05 | 3.28±0.03 | 1.12±0.03 | 1.96±0.01 | 45.32±0.50 | 22.9±0.25  | 10.15±0.11 | 7.86±0.09  | 2.17±0.03 | 33.23±0.34 |
| S18 | 4.05±0.01 | 30.83±0.09 | 4.12±0.02 | 1.41±0.01 | 0.97±0.00 | 3.83±0.12  | 2.40±0.20 | 2.05±0.12 | 1.07±0.00 | 1.52±0.01 | 53.91±0.32 | 18.63±0.07 | 14.38±0.05 | 14.4±0.05  | 3.40±0.01 | 23.42±0.09 |
| S19 | 3.76±0.01 | 18.97±0.07 | 3.67±0.01 | 1.02±0.01 | 0.78±0.02 | 3.34±0.01  | 2.87±0.01 | 1.74±0.01 | 0.95±0.00 | 1.19±0.11 | 60.24±0.14 | 17.8±0.02  | 13.92±0.02 | 12.54±0.03 | 3.07±0.01 | 20.44±0.06 |
| S20 | 3.92±0.01 | 37.3±0.05  | 4.1±0.01  | 1.43±0.00 | 0.77±0.01 | 1.62±0.06  | 2.13±0.12 | 2.72±0.07 | 0.86±0.00 | 1.15±0.18 | 43.54±0.11 | 17.41±0.93 | 5.32±0.18  | 9.42±0.03  | 1.51±0.02 | 21.8±0.07  |
| S21 | 3.52±0.06 | 13.94±0.23 | 2.99±0.05 | 3.12±0.04 | 5.12±0.08 | 13.43±0.19 | 0.48±0.12 | 0.94±0.11 | 2.18±0.03 | 2.67±0.06 | 48.65±0.72 | 14.42±0.24 | 37.53±0.55 | 34.99±0.62 | 6.84±0.28 | 37.82±0.67 |
